# Supplementary material for: Computational Study of SARS-CoV-2 RNA Dependent RNA Polymerase Allosteric Site Inhibition
Source: MDPI journal article supplement (doi:10.3390/molecules27010223), 2021-12-30
Supplement: s1 [file s1]

# Computational Study of SARS-CoV-2 RNA Dependent RNA Polymerase Allosteric Site Inhibition

Shah Faisal <sup>1</sup>, Syed Lal Badshah <sup>1,\*</sup>, Bibi Kubra <sup>1</sup>, Mohamed Sharaf <sup>2,3</sup>, Abdul-Hamid Emwas <sup>4</sup>, Mariusz Jaremko <sup>5,\*</sup> and Mohnad Abdalla <sup>6,\*</sup>

<sup>1</sup> Department of Chemistry, Islamia College University Peshawar, Peshawar 25120, Pakistan; faisalvbs@gmail.com (S.F.); kubrakha621@gmail.com (B.K.)

<sup>2</sup> Department of Biochemistry and Molecular Biology, College of Marine Life Sciences, Ocean University of China, Qingdao 266003, China; mohamedkamel@azhar.edu.eg

<sup>3</sup> Department of Biochemistry, Faculty of Agriculture, AL-Azhar University, Nasr City, Cairo 11751, Egypt

<sup>4</sup> Core Labs., King Abdullah University of Science and Technology (KAUST), Thuwal 23955-6900, Saudi Arabia; abdelhamid.emwas@kaust.edu.sa

<sup>5</sup> Smart-Health Initiative (SHI) and Red Sea Research Center (RSRC), Division of Biological and Environmental Sciences and Engineering (BESE), King Abdullah University of Science and Technology (KAUST), Thuwal 23955-6900, Saudi Arabia.

<sup>6</sup> Key Laboratory of Chemical Biology (Ministry of Education), Department of Pharmaceutics, School of Pharmaceutical Sciences, Cheeloo College of Medicine, Shandong University, 44 Cultural West Road, Jinan 250012, China

\* Correspondence: sbadshah@icp.edu.pk (S.L.B.); mariusz.jaremko@kaust.edu.sa (M.J.); mohnadabdalla200@gmail.com (M.A.)

**Table S1.** The docked flavonoid molecule with binding free energy, types of interaction with RdRp enzyme, and residues involved in interaction with the ligand.

| S/N | Flavonoid                                                                  | Docking S-Score | Interactions Formed        | Residues Involved in Interactions |
|-----|----------------------------------------------------------------------------|-----------------|----------------------------|-----------------------------------|
| 1   | (Z)-2-((1-butyl-1H-indol-3-yl)methylene)-4,6-dihydroxybenzofuran-3(2H)-one | -13.12 kcal/mol | 1 Arene-Cation interaction | Arg583                            |
| 2   | 4',5,6,7-Tetramethylflavone                                                | -11.66 kcal/mol | None                       | -                                 |
| 3   | 5,7,30,40 -tetra-O-methylquercetin                                         | -13.32 kcal/mol | 1 Arene-Cation<br>1 H-bond | Arg583, Asn600                    |
| 4   | 5-Hydroxy-3,3',4',6,7,8-hexamethylflavone                                  | -12.96 kcal/mol | 1 H-Bond                   | Asn600                            |
| 5   | 6,7-Dihydroxyflavone                                                       | -11.02 kcal/mol | 2 H-Bonds                  | Asn600, Thr604                    |
| 6   | L-Epicatechin                                                              | -15.01 kcal/mol | 1 H-Bond                   | Asn600                            |
| 7   | 6-Chloro-3-methoxy-4'-oxazolinylflavone                                    | -11.26 kcal/mol | None                       | -                                 |
| 8   | 6-Chloro-4'-oxazolinylflavanone                                            | -10.66 kcal/mol | 1 H-Bond                   | Asn600                            |
| 9   | 6-Chloro-4'-oxazolinylflavone                                              | -11.58 kcal/mol | None                       | -                                 |
| 10  | 3,5,7,2'-Tetrahydroxyflavone                                               | -11.26 kcal/mol | 1 H-Bond                   | Asn600                            |
| 11  | PubChem-CID: 6481172                                                       | -10.39 kcal/mol | None                       | -                                 |
| 12  | 7"-methylamentoflavone                                                     | -13.39 kcal/mol | 2 H-Bonds                  | With Thr604                       |
| 13  | Amentoflavone                                                              | -15.83 kcal/mol | None                       | -                                 |
| 14  | Apigenin                                                                   | -10.97 kcal/mol | 1 H-Bond                   | Asn600                            |

|    |                                                        |                 |                             |                                                              |
|----|--------------------------------------------------------|-----------------|-----------------------------|--------------------------------------------------------------|
| 15 | Astilbin                                               | -13.76 kcal/mol | 1 H-Bond<br>1-Arene-Cation  | Arg583, Asn600                                               |
| 16 | Baicalein                                              | -12.70 kcal/mol | 1 H-Bond                    | Asn600                                                       |
| 17 | 3,7,4'-Trihydroxyflavone                               | -10.56 kcal/mol | 1 Arene-Cation<br>3 H-bonds | Met755, Ser592, Arg583, Thr604                               |
| 18 | Biochanin A                                            | -12.00 kcal/mol | 1 Arene-Cation              | Arg583                                                       |
| 19 | Cianidanol                                             | -12.76 kcal/mol | None                        | -                                                            |
| 20 | DihydroQuercetin                                       | -12.75 kcal/mol | None                        | -                                                            |
| 21 | Diosmin                                                | -14.35 kcal/mol | 4 H-Bonds                   | Tyr595, Arg583, Ser592, Thr604                               |
| 22 | PubChem-CID <a href="#">3086603</a>                    | -17.29 kcal/mol | 4 H-Bonds                   | 2 + Asn600, Thr582, Val587,<br>Ala585                        |
| 23 | Epicatechin Gallate                                    | -14.57 kcal/mol | 1 Arene-Cation              | Arg583                                                       |
| 24 | Eriocitrin                                             | -14.14 kcal/mol | 2 H-Bonds                   | Ala585, Arg583                                               |
| 25 | Eriodictyol 7-glucuronide                              | -18.09 kcal/mol | 4 H-Bonds                   | Met755, Tyr595, Asn600, Gly584                               |
| 26 | Tetrahydroxyflavanone                                  | -12.63 kcal/mol | 1 H-Bond                    | Ser592                                                       |
| 27 | Fustin                                                 | -12.69 kcal/mol | 1 Arene-Cation<br>4 H-Bonds | Arg583, Met601, Thr604, Ala585                               |
| 28 | Gabranine                                              | -11.29 kcal/mol | None                        | -                                                            |
| 29 | Galangin                                               | -13.69 kcal/mol | 1 Arene-Cation<br>2 H-Bonds | Arg583, Thr604, Ser592                                       |
| 30 | Gallomyricitrin                                        | -17.11 kcal/mol | Arene-Cation,<br>5H-Bonds   | 2+Ser592 and 1 H-Bond with<br>Arg583, Asn600, Met601, Ala585 |
| 31 | Garcinia biflavonoid 2                                 | -12.54 kcal/mol | 1AreneCation,<br>2 H-Bonds  | Asn600, Arg583, Tyr595                                       |
| 32 | Genistein                                              | -12.40 kcal/mol | 1 Arene-Cation              | Arg583                                                       |
| 33 | Gossypetin                                             | -14.85 kcal/mol | 3H-Bonds                    | Ser592, Asn600, Ala585                                       |
| 34 | Herbacetin                                             | -11.76 kcal/mol | 1 H-Bond                    | Ser592                                                       |
| 35 | Hidrosmine                                             | -17.51 kcal/mol | 3 H-Bonds                   | Phe594, Asn600, Ala585                                       |
| 36 | Hyperoside                                             | -14.44 kcal/mol | 3 H-Bonds<br>1 Arene-Cation | Arg583, Thr604, Asn600, Ala585                               |
| 37 | Iscag                                                  | -17.63 kcal/mol | 2 H-Bonds                   | Arg583, Met755                                               |
| 38 | Isoquercitrin                                          | -15.07 kcal/mol | 3 H-Bonds                   | Asn600, Arg583                                               |
| 39 | Isorhamnetin                                           | -13.49 kcal/mol | 3 H-Bonds                   | 2 + Thr604 and 1-Asn600                                      |
| 40 | Juglanin                                               | -16.63 kcal/mol | 4 H-Bonds                   | 2 + Thr604, Arg583, Ser592                                   |
| 41 | Kolaflavanone                                          | -11.55 kcal/mol | 1 Arene-Cation<br>2 H-Bonds | 2 + Arg583, Tyr595                                           |
| 42 | Ladanein (BJ486K)                                      | -13.15 kcal/mol | 1 Arene-Cation<br>1 H-Bond  | Arg583, Thr604                                               |
| 43 | Leachianone G                                          | -12.50 kcal/mol | None                        | -                                                            |
| 44 | Loquatoside                                            | -14.33 kcal/mol | 2 H-Bonds                   | Asn600, Tyr595                                               |
| 45 | Luteolin                                               | -13.33 kcal/mol | 1 H-Bond                    | Thr604                                                       |
| 46 | Meloside A                                             | -17.92 kcal/mol | 4 H-Bonds                   | 2+Asn600, Tyr595, Met755                                     |
| 47 | Methyl<br>6-chloro-3-methoxyflavone-4'-carbox<br>ylate | -12.89 kcal/mol | None                        | -                                                            |
| 48 | Morin                                                  | -13.75 kcal/mol | 1 Arene-Cation              | Arg583, Thr604, Asn600, Ser592                               |

|    |                                                                  |                 |                             |                                                     |
|----|------------------------------------------------------------------|-----------------|-----------------------------|-----------------------------------------------------|
|    |                                                                  |                 | 3 H-Bonds                   |                                                     |
| 49 | Myrciatrin V                                                     | -16.39 kcal/mol | 3 H-Bonds                   | 2+Asn600, Met601                                    |
| 50 |                                                                  |                 |                             |                                                     |
| 51 | Myricitrin                                                       | -16.23 kcal/mol | 1 Arene-Cation<br>6 H-Bonds | 2+Arg583, Ala584, Ser592, Met601,<br>Thr604, Asn600 |
| 52 | Narcissin                                                        | -16.04 kcal/mol | 3 H-Bonds                   | Arg583, Asn600, Thr604                              |
| 53 | Naringenin                                                       | -12.07 kcal/mol | 1 H-Bond                    | Arg583                                              |
| 54 | Pachypodol                                                       | -12.51 kcal/mol | 1 Arene-Cation<br>2 H-Bonds | Arg583, Ala585, Asn600                              |
| 55 | Pectolarin                                                       | -13.55 kcal/mol | 3 H-Bonds                   | Arg583, Ser592, Asn600                              |
| 56 | Quercetagenin                                                    | -14.16 kcal/mol | 1 Arene-Cation<br>3 H-Bonds | Arg583, Ser592, Asn600, Ala585                      |
| 57 | Quercetin<br>3-(6''-(E)-p-coumaroylsophoroside)-7-<br>rhamnoside | -18.02 kcal/mol | 5 H-Bonds                   | Ala585, Met601, Thr604,<br>Arg583, Gly584           |
| 58 | Quercetin-3 $\beta$ -O-D-glucoside                               | -15.53 kcal/mol | 4 H-Bonds                   | Arg583, Ala585, Asn600, Ala585                      |
| 59 | Quercetin-3,4'-di-O-glucoside                                    | -14.74 kcal/mol | 5 H-Bonds                   | 2+Asn600, Arg583, Ser592, Tyr595                    |
| 60 | Quercetin                                                        | -13.58 kcal/mol | 1 H-Bond                    | Thr604                                              |
| 61 | Quercitrin                                                       | -14.35 kcal/mol | 1 Arene-Cation<br>3 H-Bonds | 2+Arg583, 2+ Asn600                                 |
| 62 | Rhoifolin                                                        | -13.21 kcal/mol | 2 H-Bonds                   | Arg583, Ser592                                      |
| 63 | Robustafavone                                                    | -19.10 kcal/mol | 1 H-Bond                    | Met755                                              |
| 64 | Rutin                                                            | -16.53 kcal/mol | 1 Arene-Cation<br>4 H-Bonds | 2+Thr604, Met601, Arg583<br>Ser592                  |
| 65 | Saponarin                                                        | -15.03 kcal/mol | 4 H-Bonds                   | Met755, Asn600, Arg583,<br>Ser592                   |
| 66 | Scutellarein                                                     | -14.31 kcal/mol | 2 H-Bonds                   | Met755, Asn600                                      |
| 67 | Sigmoidin                                                        | -13.63 kcal/mol | 3 H-Bonds                   | 2+Arg583, Thr604                                    |
| 68 | Silibinin B dihemisuccinate disodium                             | -12.50 kcal/mol | 2 Arene-Cation<br>3 H-Bonds | 2+Arg583, Thr604, Met601, Ser592                    |
| 69 | Silibinin B dihemisuccinate                                      | -14.95 kcal/mol | 1 Arene-Cation<br>4 H-Bonds | 2+Arg583, Ser592, Asn600,<br>Gln932                 |
| 70 | Silymarin                                                        | -14.66 kcal/mol | 1 Arene-Cation<br>3 H-Bonds | Arg583, Ser592, Thr604, Tyr595                      |
| 71 | SRS                                                              | -11.67 kcal/mol | 4 H-Bonds                   | Ser592, Asn600, Gly584, Arg583                      |
| 72 | Sulfated Silibinin                                               | -11.66 kcal/mol | 2 H-Bonds                   | Thr604, Ala585                                      |
| 73 | PubChem CID-5321560                                              | -11.87 kcal/mol | 1 Arene Cation,<br>1 H-Bond | Arg583, Ala585                                      |
| 74 | Taiwanhomoflavone A                                              | -13.55 kcal/mol | 1 Arene Cation,<br>1 H-Bond | Asn600, Arg583                                      |
| 75 | Tetra-O-(beta-hydroxyethyl)rutoside                              | -13.38 kcal/mol | 1 Arene Cation,<br>5 H-Bond | 3+Arg583, 2+Asn600, Thr604                          |
| 76 | Theaflavin 3'-gallate                                            | -16.85 kcal/mol | None                        | -                                                   |
| 77 | Theaflavin                                                       | -14.04 kcal/mol | 1 Arene Cation,<br>2 H-Bond | Arg583, Tyr595, Asn600                              |
| 78 | Tricetin                                                         | -10.45 kcal/mol | 3 H-Bonds                   | 2+Asn600, Arg583                                    |

|    |                                                              |                 |                              |                                                 |
|----|--------------------------------------------------------------|-----------------|------------------------------|-------------------------------------------------|
| 79 | Viscumneoside V                                              | -14.47 kcal/mol | 7 H-Bonds                    | Arg583,Gln932,Gly584,2+Ala585,<br>Tyr595,Ser592 |
| 80 | Wubangzicide C                                               | -15.42 kcal/mol | 1 Arene Cation,<br>5 H-Bonds | 3+ Arg583, Ser592, Tyr595,Thr604                |
| 81 | Zivulgarin                                                   | -18.41 kcal/mol | 3 H-Bonds                    | Phe595,Asn600,Met755                            |
| 82 | Dihydromyricetin                                             | -15.32 kcal/mol | 1 Arene Cation,<br>4 H-Bonds | Arg583,Ser592,Met601,Ala585,As<br>n600          |
| 83 | Hesperetin                                                   | -11.96 kcal/mol | 1 Arene Cation,<br>1 H-Bond  | Arg583,Thr604                                   |
| 84 | Kaempferol                                                   | -12.17 kcal/mol | 1 H-Bond                     | Thr604                                          |
| 85 | Pinocembrin                                                  | -11.49 kcal/mol | 1 H-Bond                     | Arg583                                          |
| 86 | Quercetin 7-rhamnoside                                       | -15.92 kcal/mol | 5 H-Bonds                    | Met601,Thr604,Asn600Ala585Phe<br>594            |
| 87 | (-)-3,3,4,5,7-Flavanpentol                                   | -11.67 kcal/mol | 1 H-bond<br>1 Arene-Cation   | Gly597,Arg583                                   |
| 88 | 3,7-Dihydroxyflavone                                         | -10.56 kcal/mol | 1 Arene-Cation<br>1 H-bonds  | Arg583,Asn600                                   |
| 89 | (-)-Epicatechin                                              | -11.78 kcal/mol | 1 H-Bond                     | Arg583                                          |
| 90 | (-)-Epigallocatechin gallate (EGCG)                          | -14.16 kcal/mol | 2 H-bonds                    | Ser595,Arg583                                   |
| 91 | (-)-Epigallocatechin (EGC)                                   | -13.41 kcal/mol | None                         | -                                               |
| 92 | (-)-Gallocatechin gallate (GCG)                              | -16.14 kcal/mol | 3 H-Bonds                    | Tyr595,Ser592,Thr604                            |
| 93 | 3,3',4',5,8-Pentahydroxyflavone                              | -15.17 kcal/mol | 1 Arene-Cation<br>2 H-bonds  | Ser592,Arg583,Thr604                            |
| 94 | 3-O-methylQuercetin                                          | -15.56 kcal/mol | 1 Arene-Cation<br>3 H-bonds  | Ser592, Met601, Arg583,<br>Thr604               |
| 95 | 6-chloro-3-hydroxyflavone-4'-<br>carboxylic acid             | -15.93 kcal/mol | 1 Arene-Cation<br>3 H-bonds  | Arg583, Thr604, Gly584, Met755                  |
| 96 | 7-O-(6-Feruoylglucosyl)isoorientin                           | -18.78 kcal/mol | 4 H-Bonds                    | 2 with Asn600,Arg583,Met601                     |
| 97 | Baicalin                                                     | -17.79 kcal/mol | 5 H-bonds                    | 4+ Asn600 and Ser592,Phe594                     |
| 98 | Cyanidin-3-( <i>p</i> -coumaroyl)-rutinoside-<br>5-glucoside | -18.88 kcal/mol | 5 H-Bonds                    | 2 with<br>Asn600,Ala581,Arg583,Met755           |

1

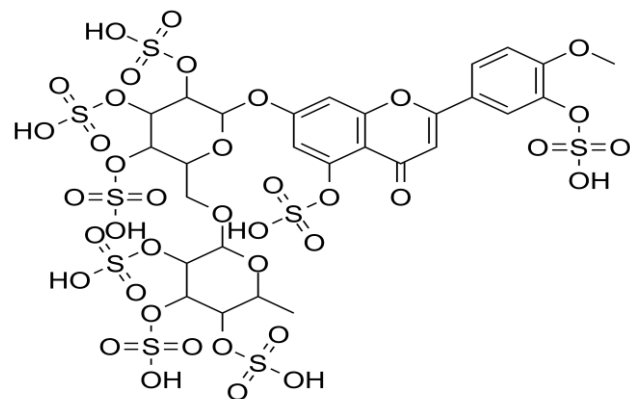

PubChem CID-3086603

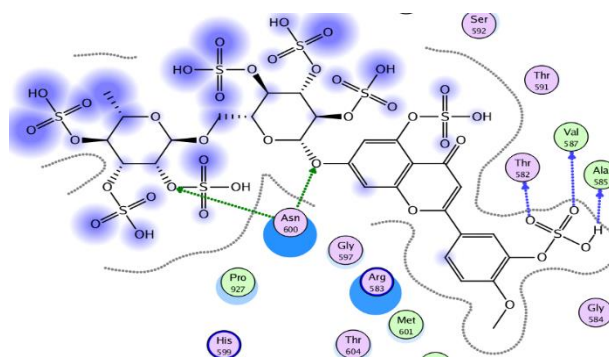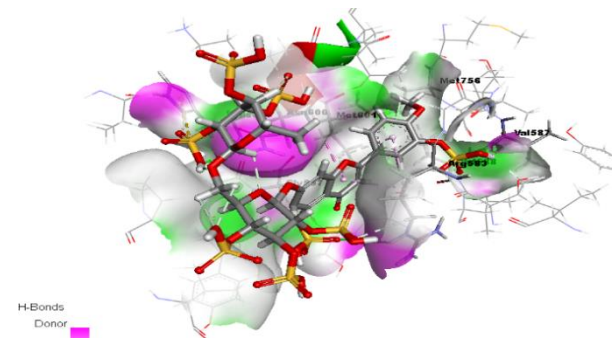

H-Bonds  
Donor  
Acceptor

2

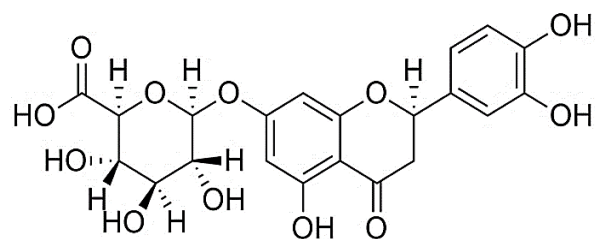

Eriodictyol 7-glucuronide

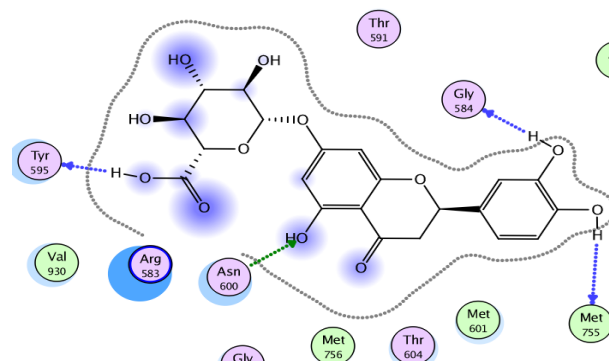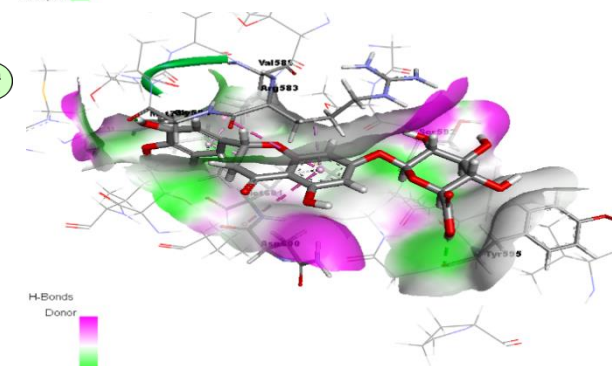

H-Bonds  
Donor  
Acceptor

3

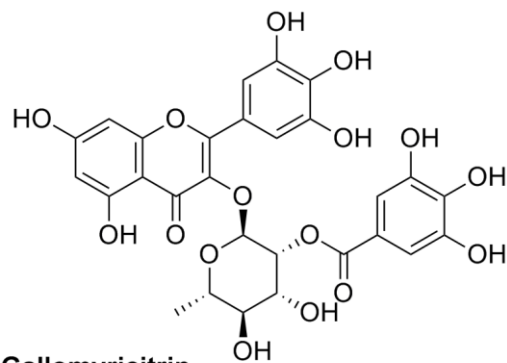

Gallomyricitrin

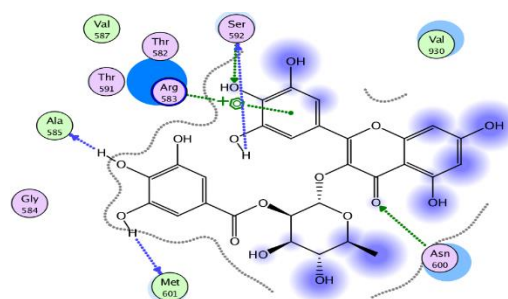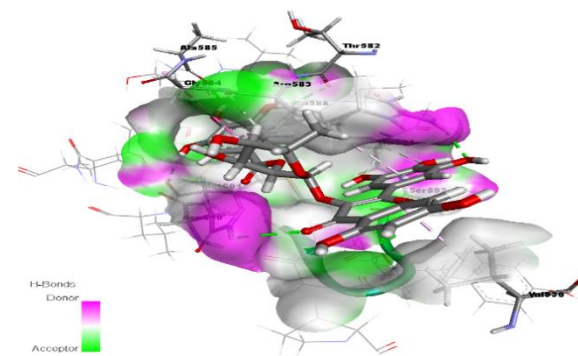

H-Bonds  
Donor  
Acceptor

4

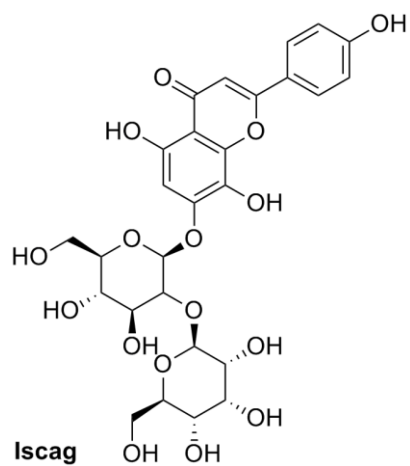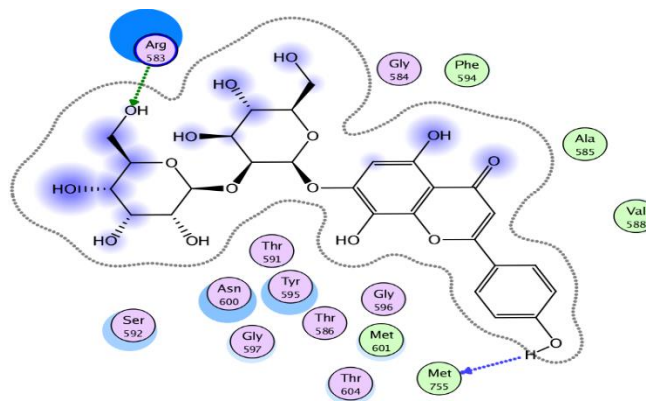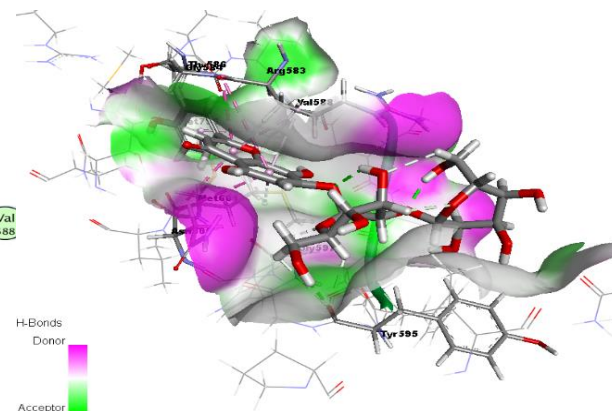

5

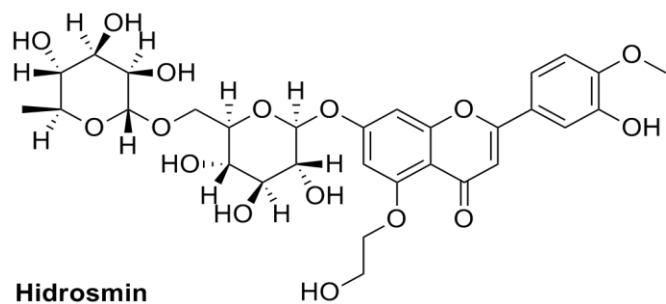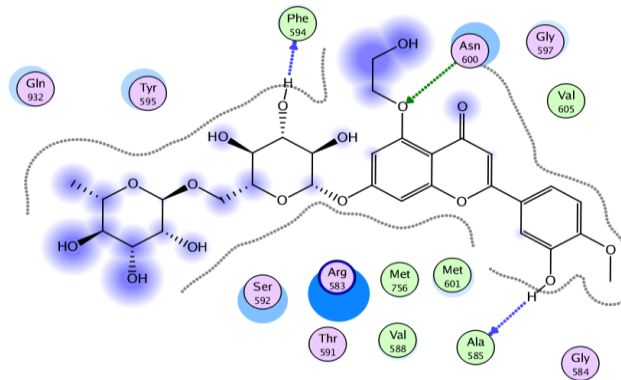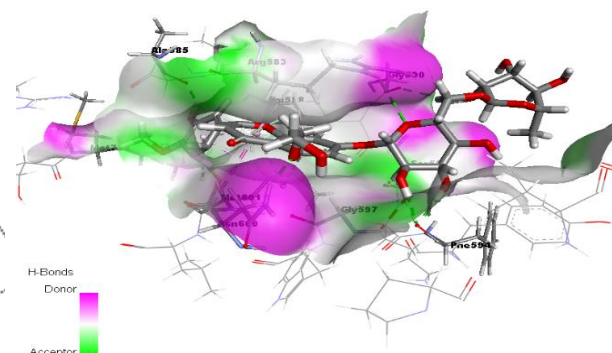



6

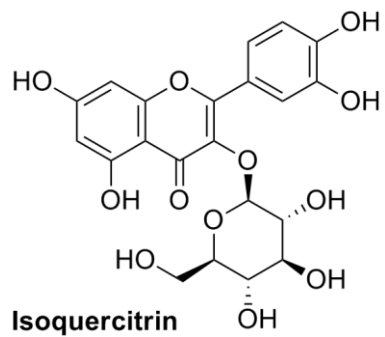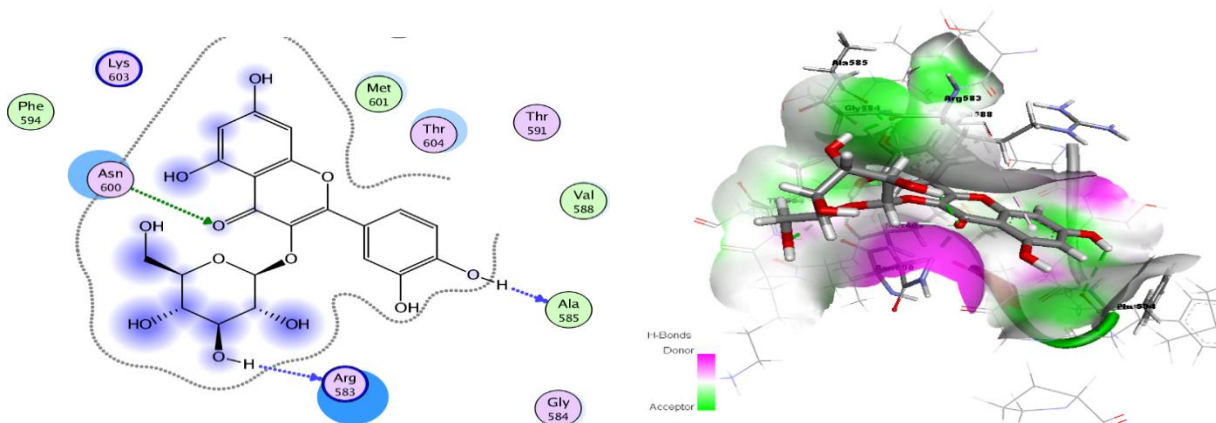

7

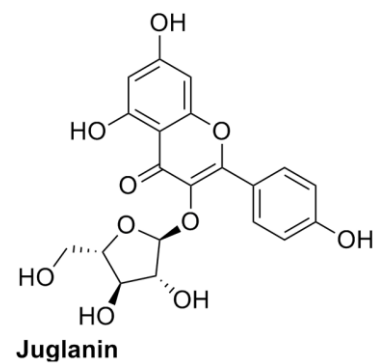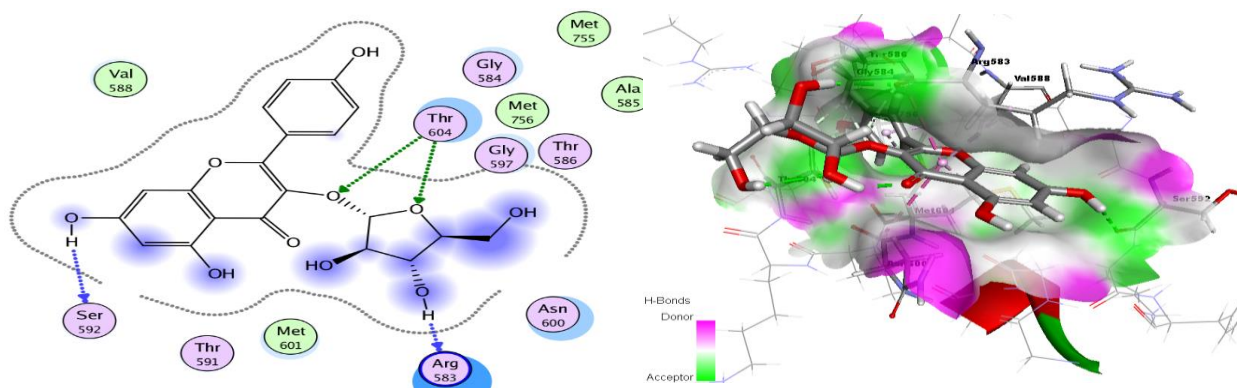

8

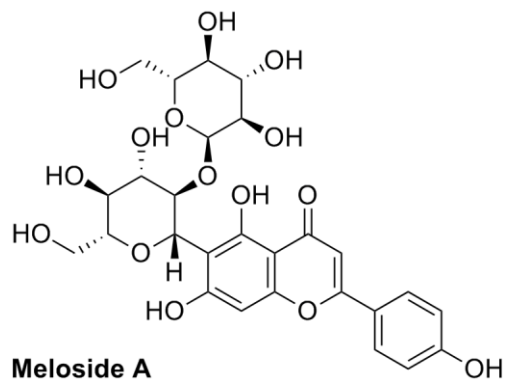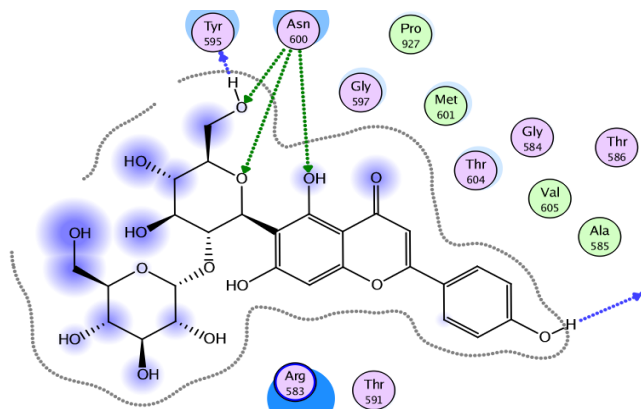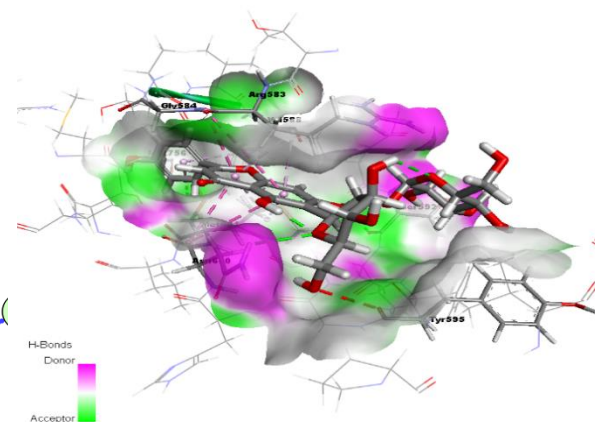

9

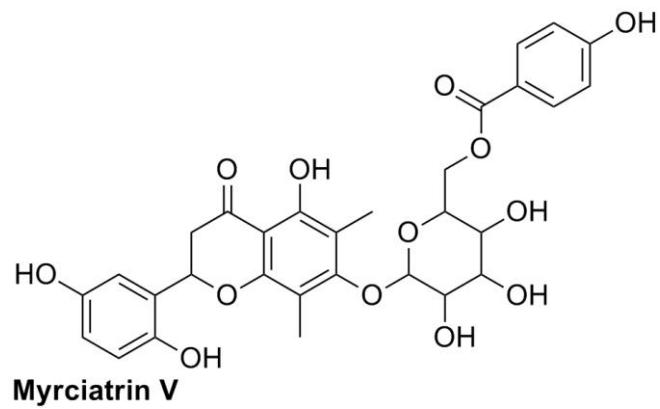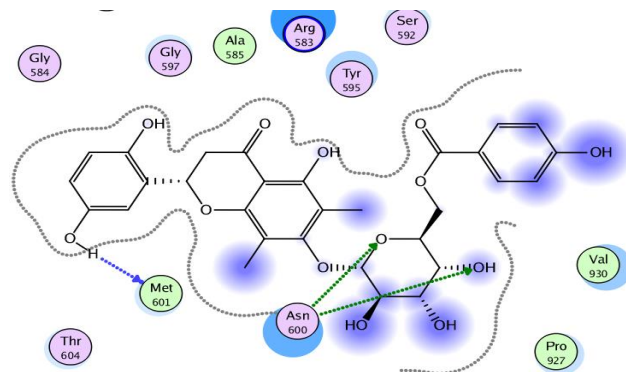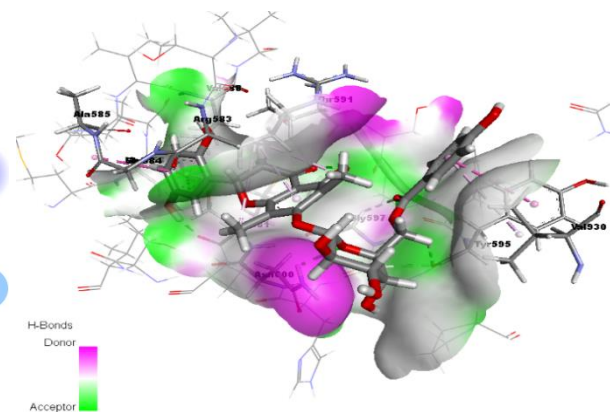



10

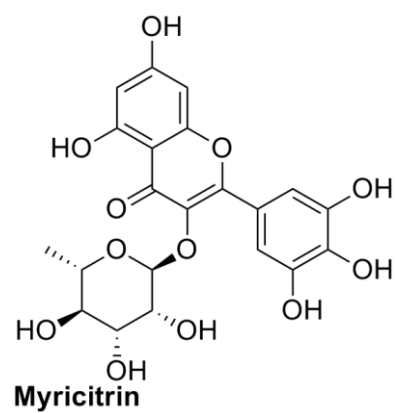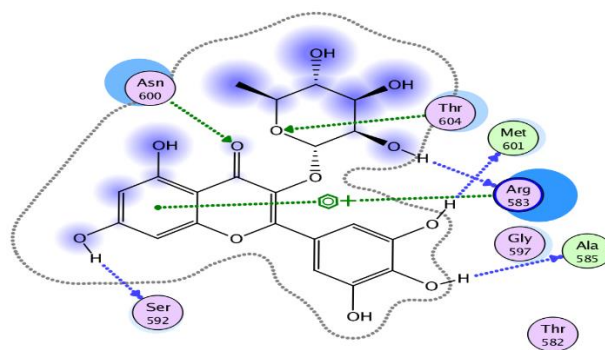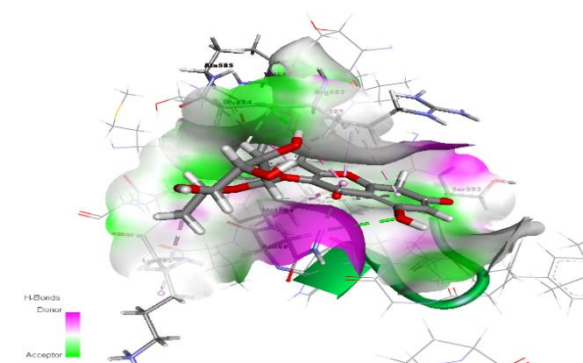

11

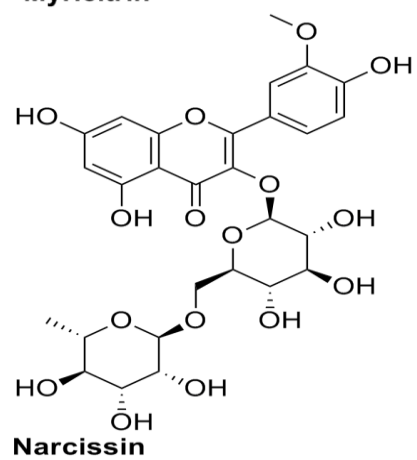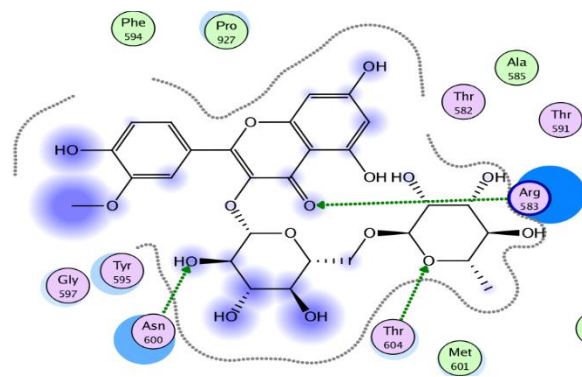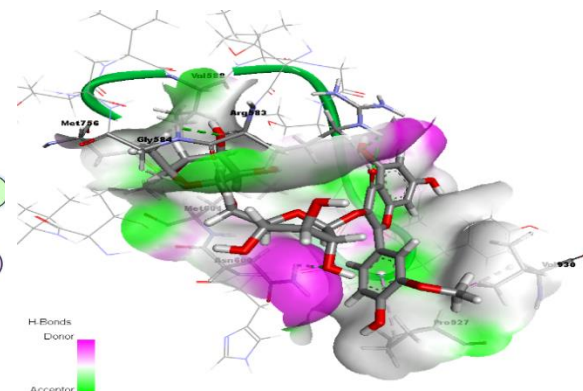

12

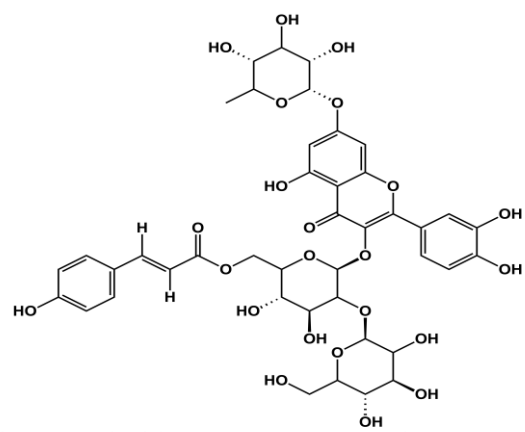

**Quercetin 3-(6''-(E)-p-coumaroylsophoroside)-7-rhamnoside**

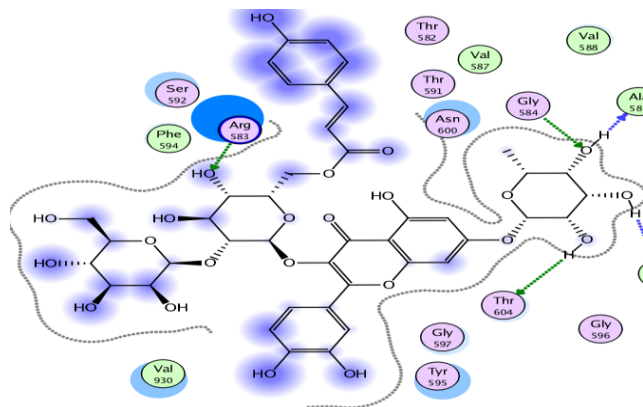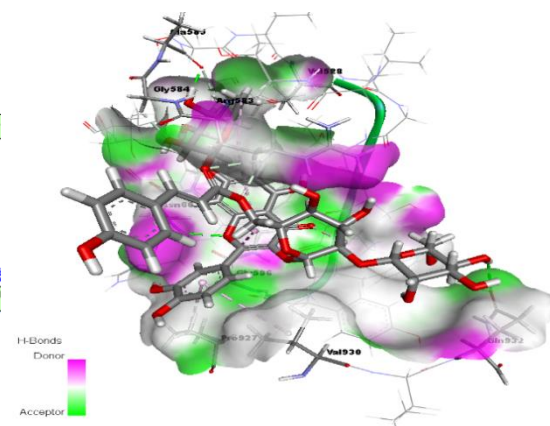

13

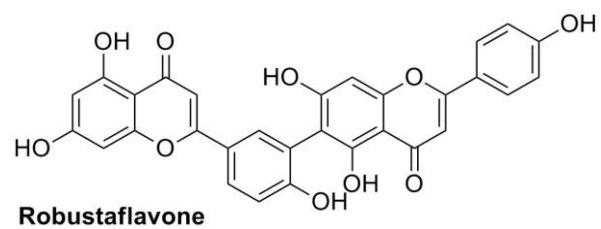

**Robustaflavone**

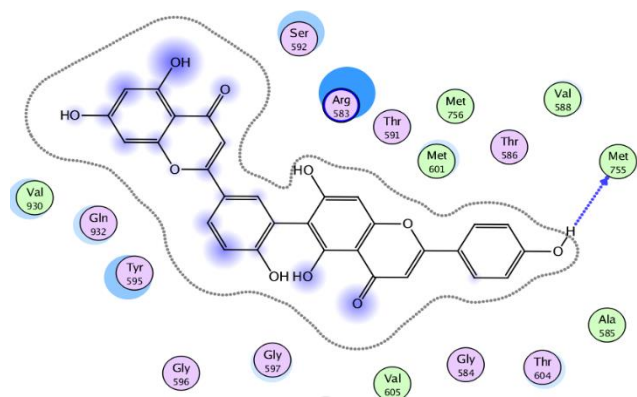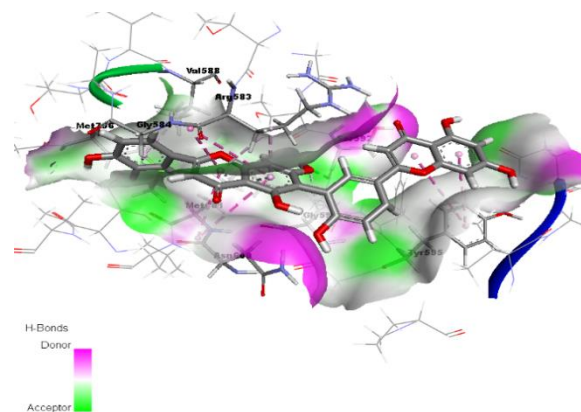

14

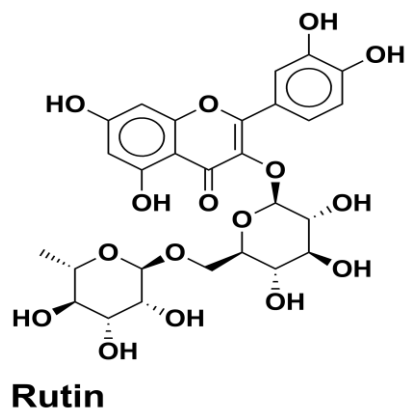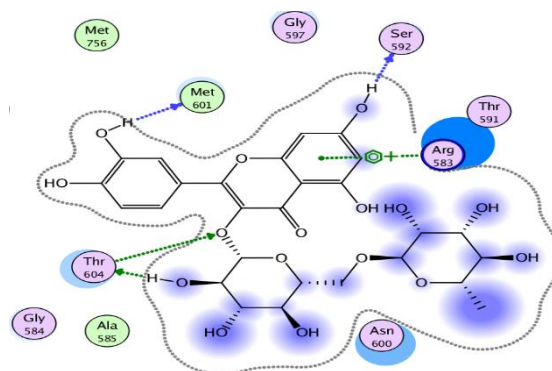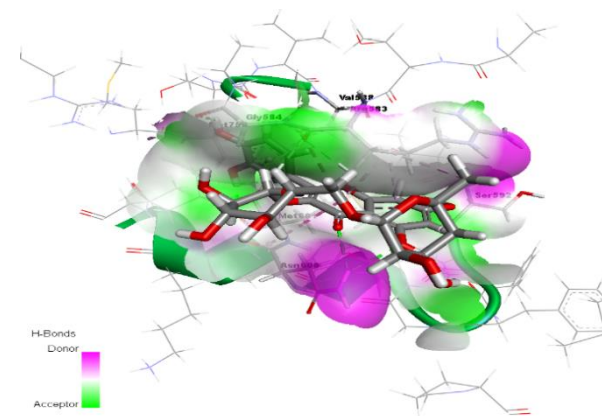

15

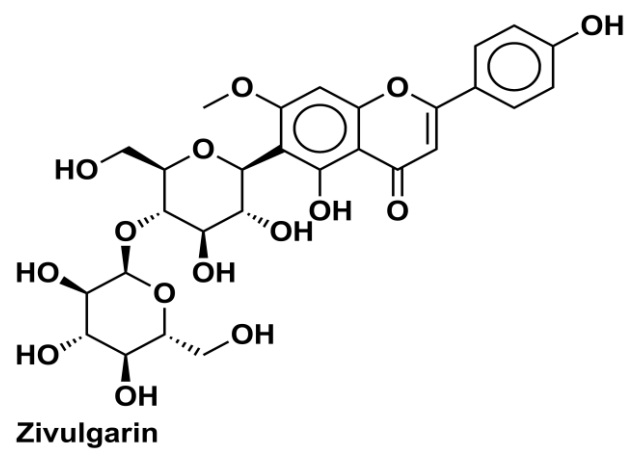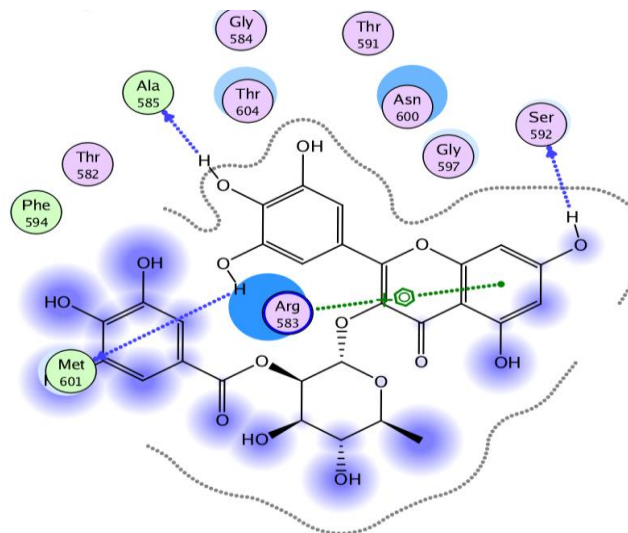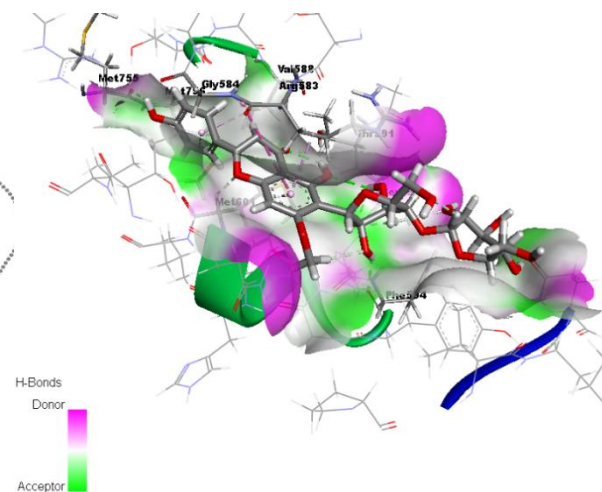

16

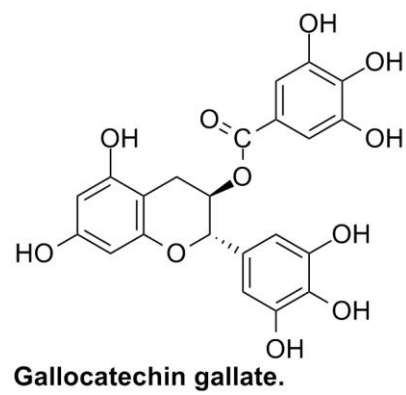

17

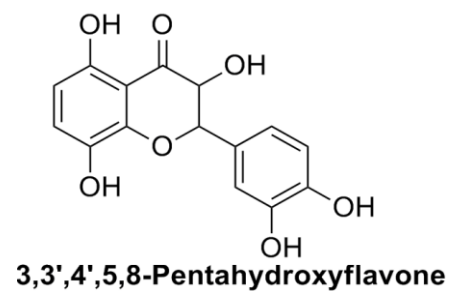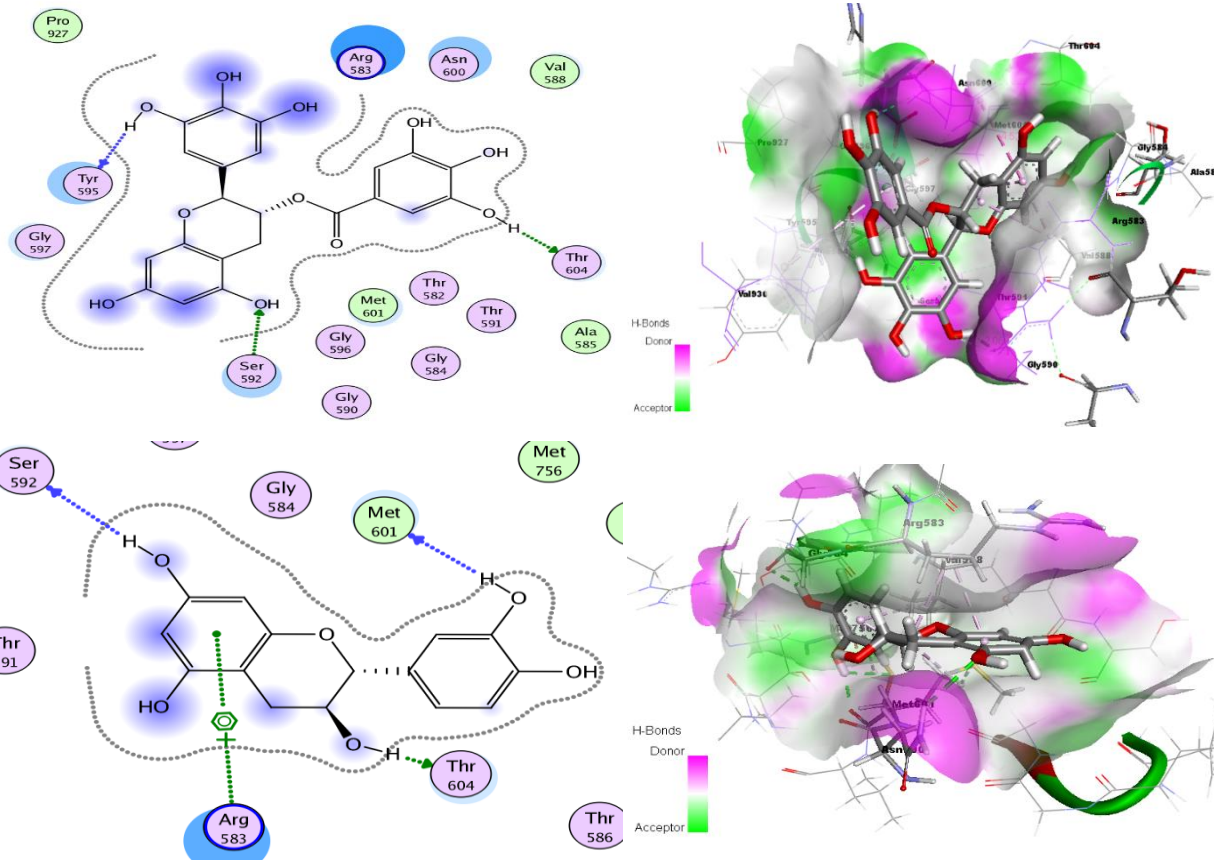



18

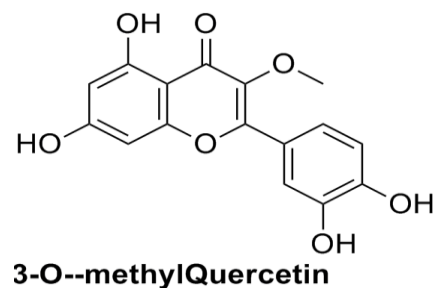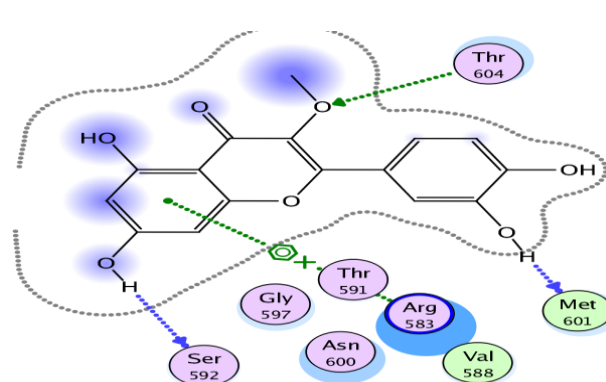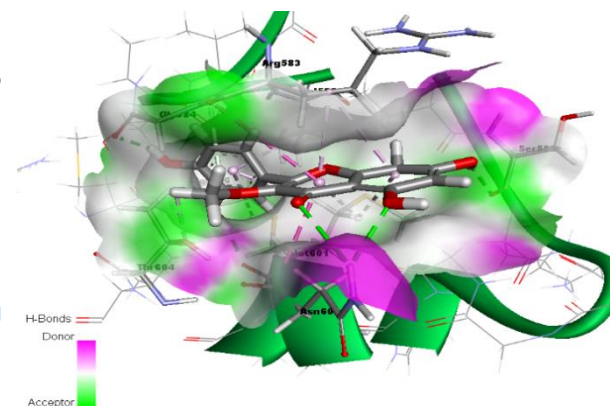

19

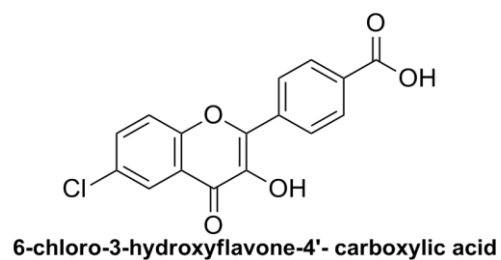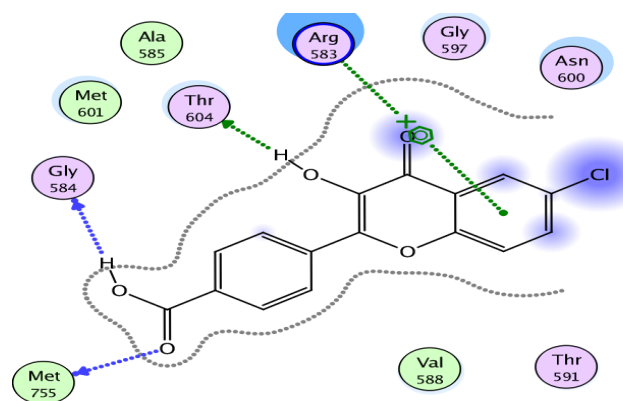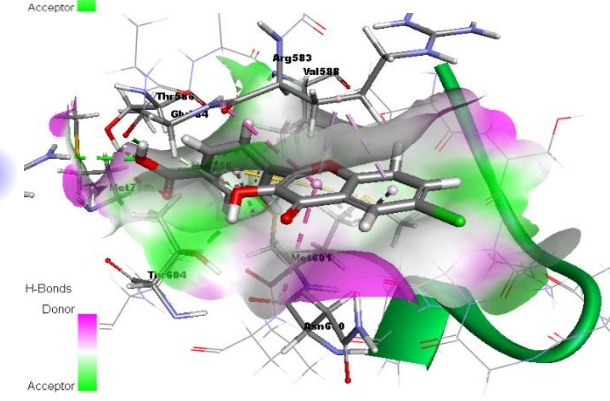

20

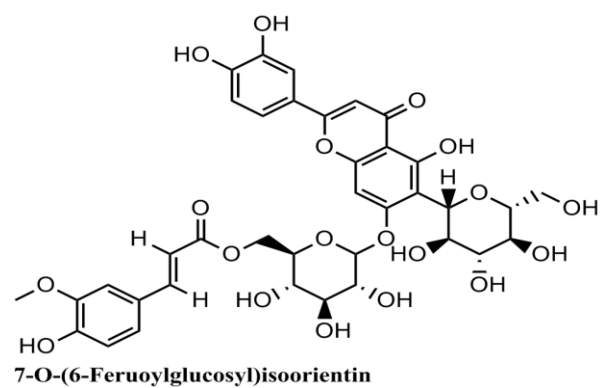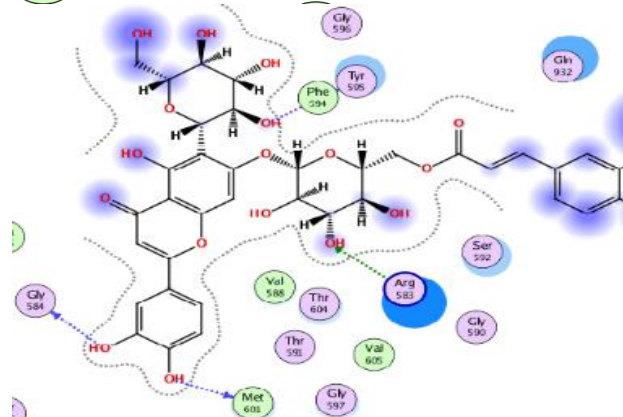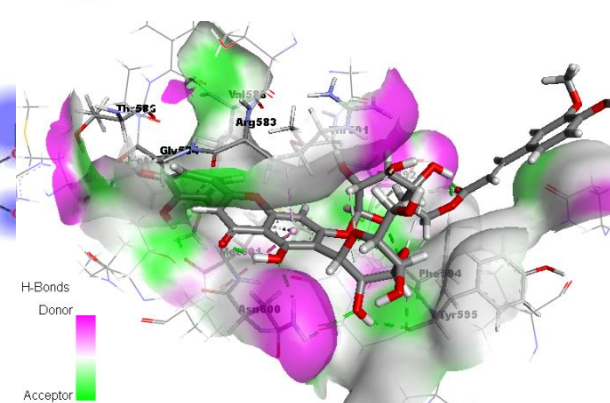

21

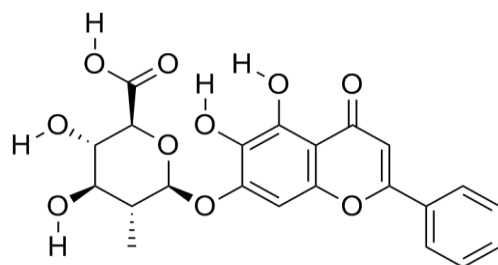**Baicalin**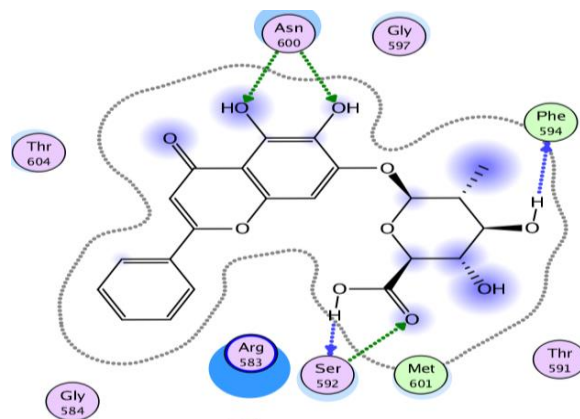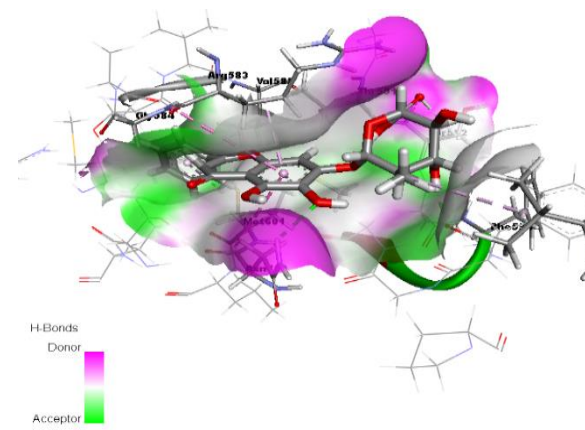

22

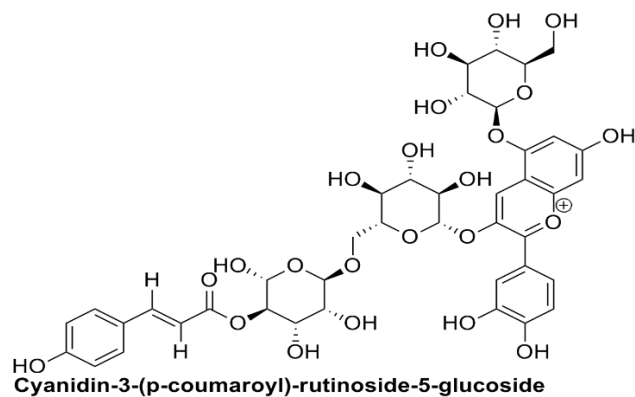**Cyanidin-3-(p-coumaroyl)-rutinoside-5-glucoside**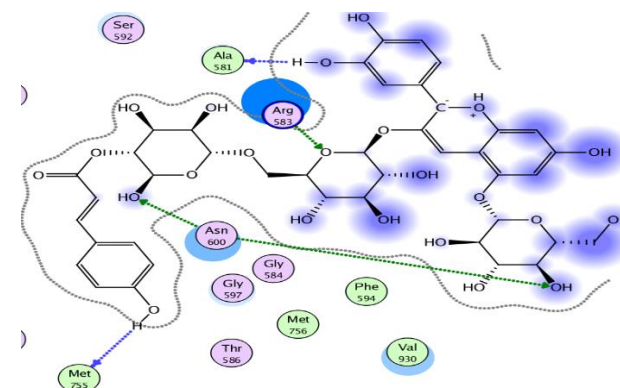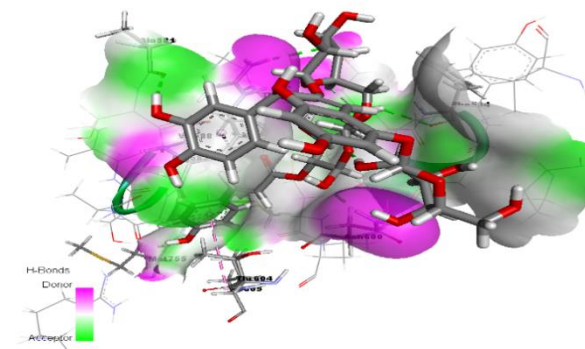**Figure S1.** The docked flavonoid molecules in 2D and 3D structure inside the allosteric binding pocket.



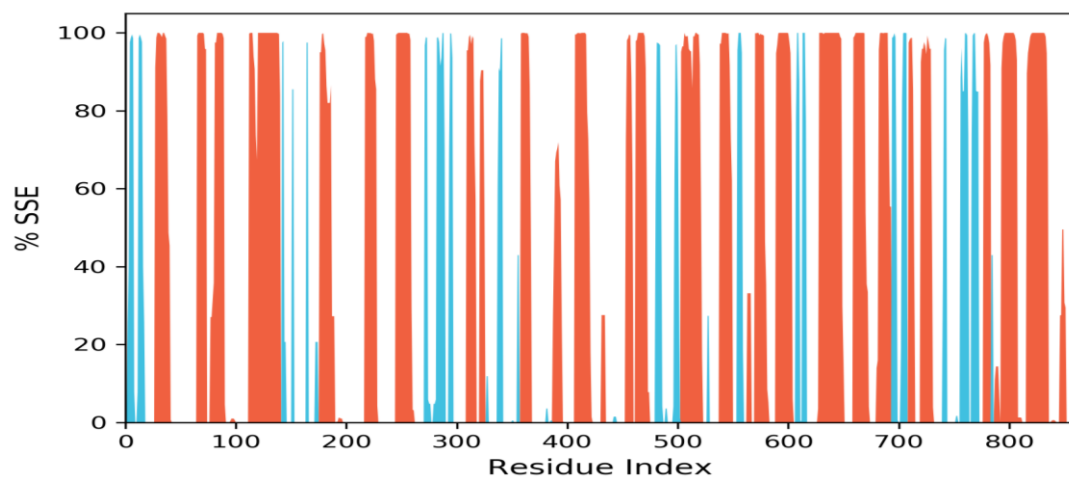

**Figure S2.** Percentage of the secondary structure elements of the residue of the apo-enzyme.

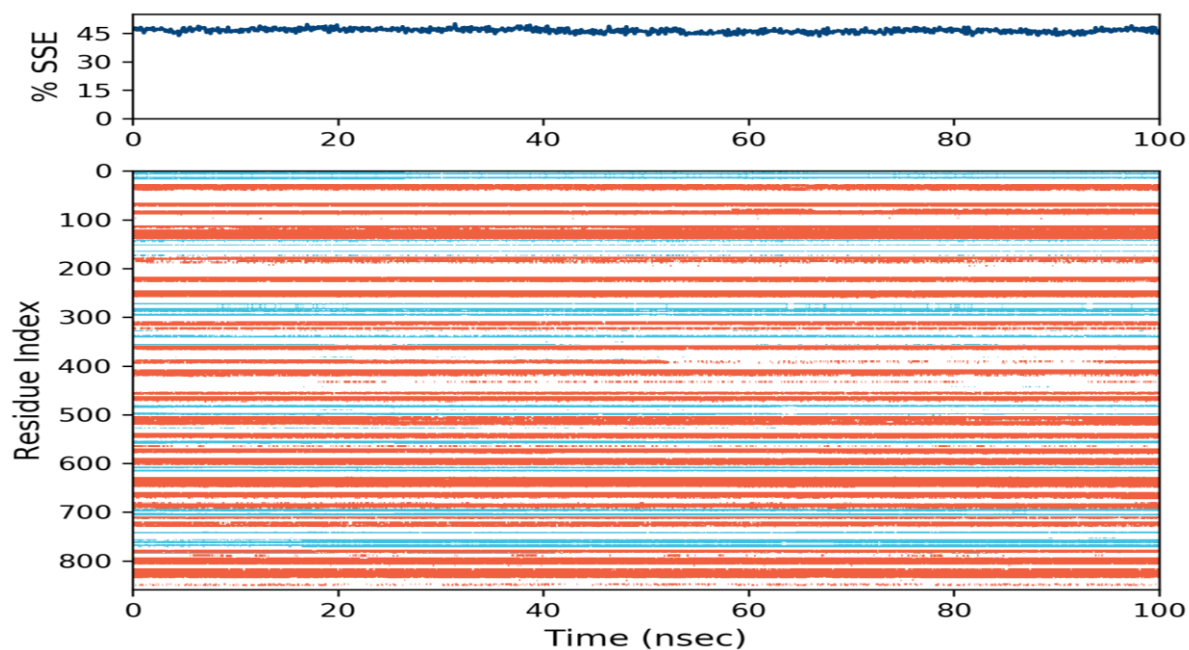

**Figure S3.** Secondary structure elements residue index of apo-protein as a function of simulation time.

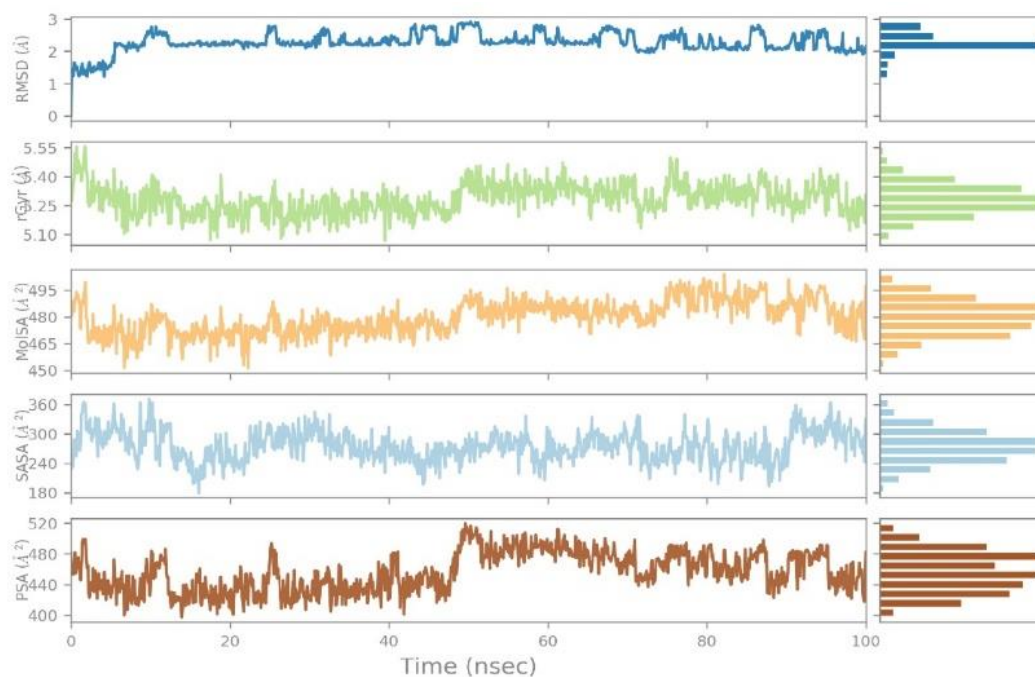

**Figure S4.** The polar surface area (PSA); solvent accessible surface area (SASA), and the van der Waals surface area (MolSA) of the RdRp in complex with aureusidin 4, 6-diglucoside.

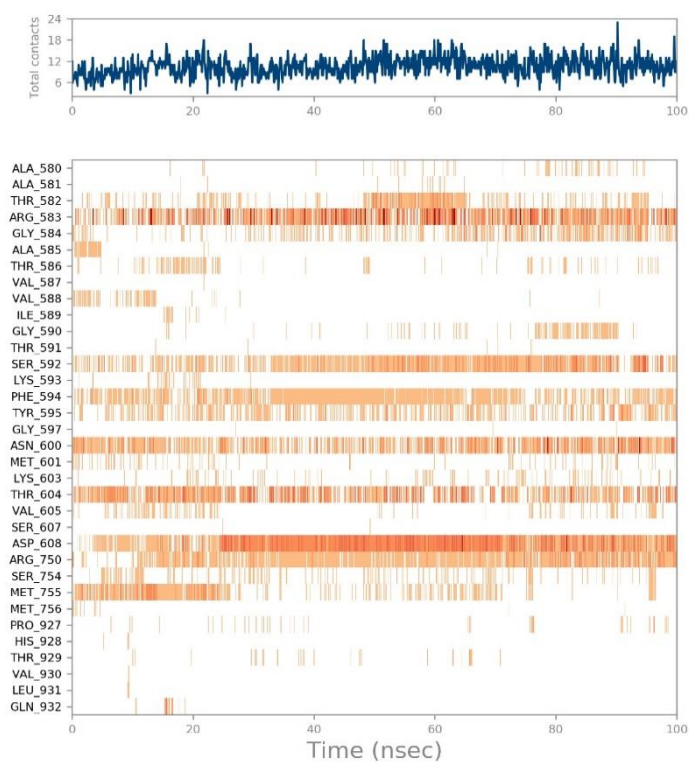

**Figure S5.** Contacts of the different residue and the ligand during the 100 ns simulation time.

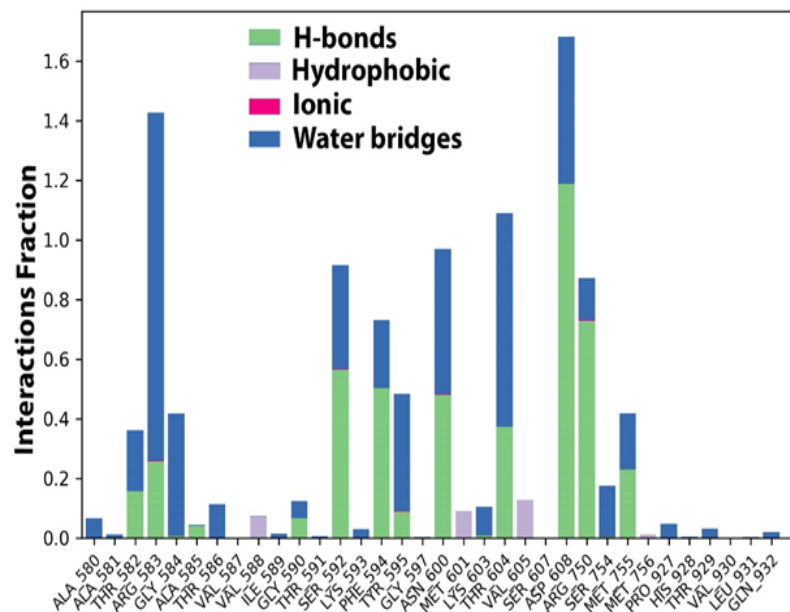

**Figure S6.** Various types of interaction made by the amino acid residues of the protein during the simulation.

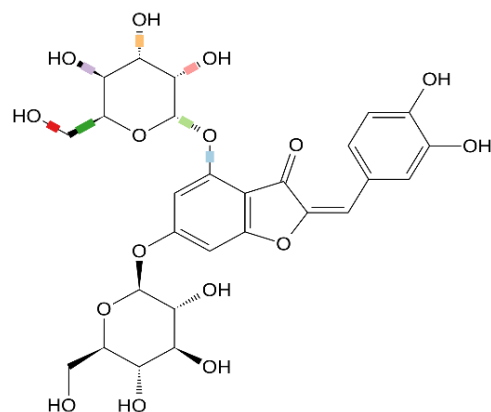

**Figure S7.** Torsion and flexibility in the aureusidin 4, 6-diglucoside.

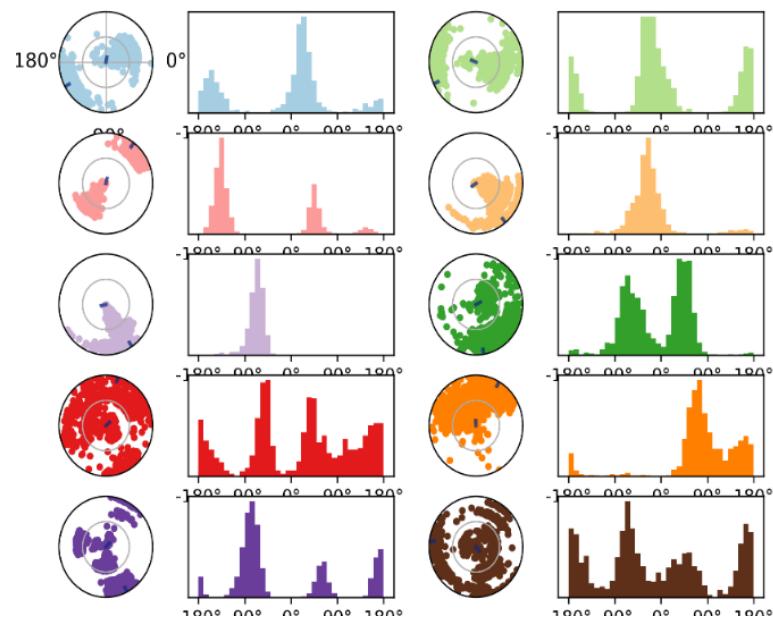

**Figure S8.** Torsional angles of the aureusidin 4, 6-diglucoside flavonoid.

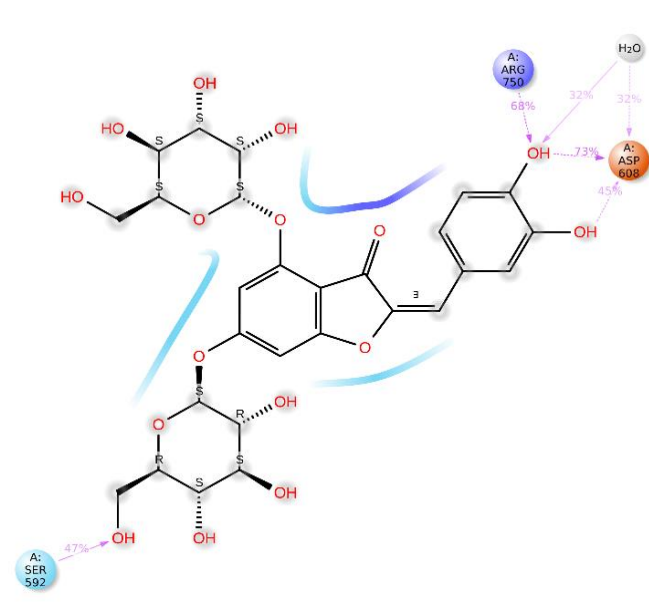

**Figure S9.** Various types of interaction made by the aureusidin 4, 6-diglucoside with the amino acid residues of the protein during the simulation.

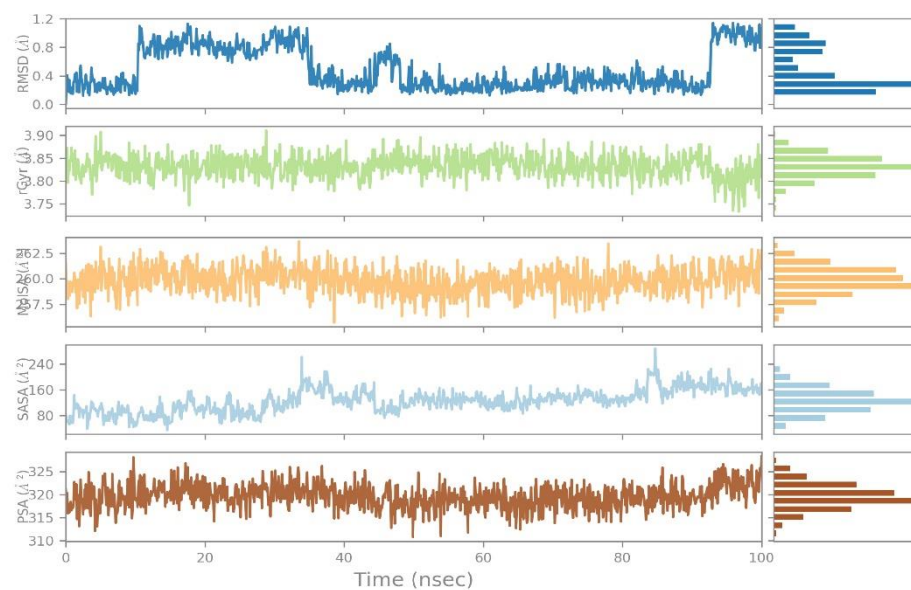

**Figure S10.** Polar Surface Area (PSA), solvent accessible surface area, the van der Waals surface area, (MolSA), radius of gyration and RMSD of the RdRp in complex with the myricetin during 100 ns simulation.

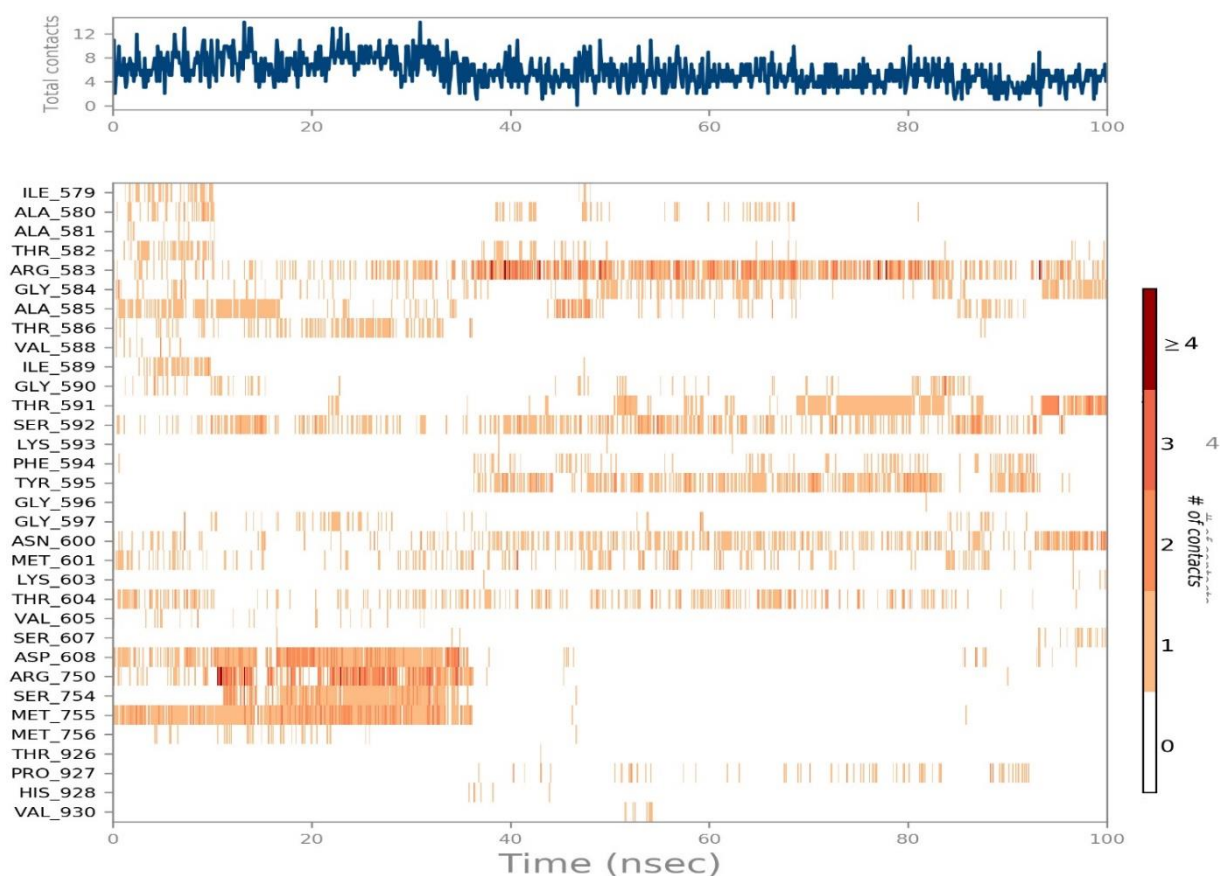

**Figure S11.** Allosteric residues contacts of the RdRp with the myricetin flavonoid ligand.

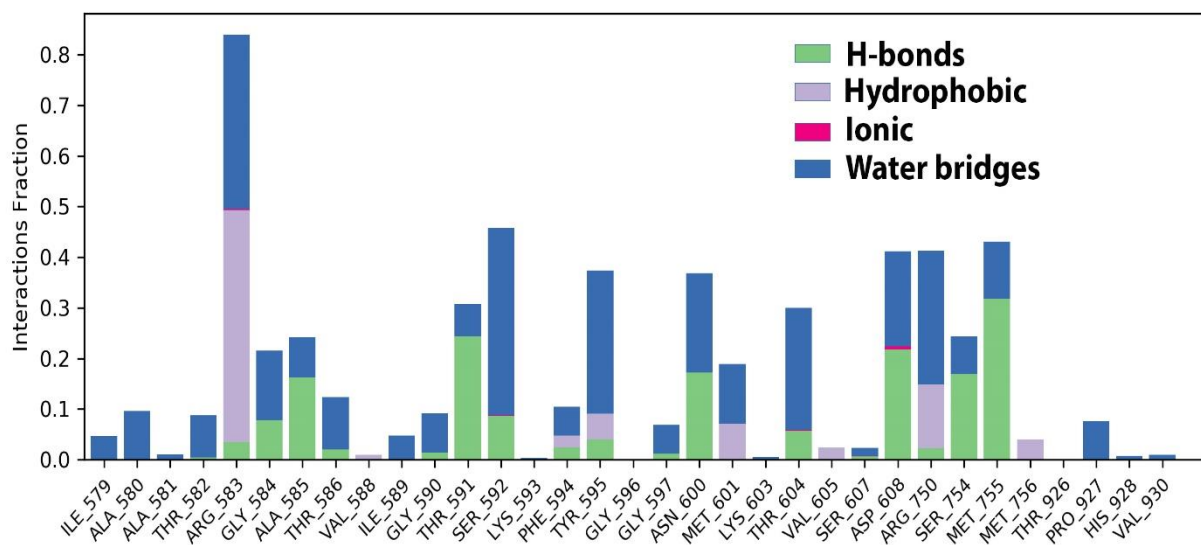

**Figure S12.** Various types of interactions made by specific amino acids with the myricetin flavonoid.

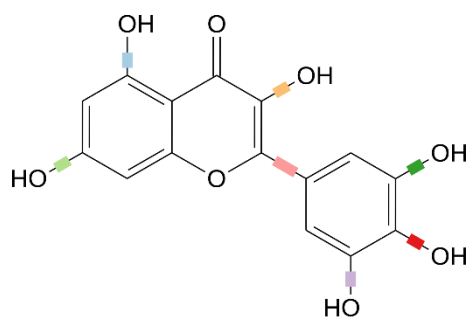

**Figure S13.** Myricetin torsions that are involved in its fluctuation inside the protein.

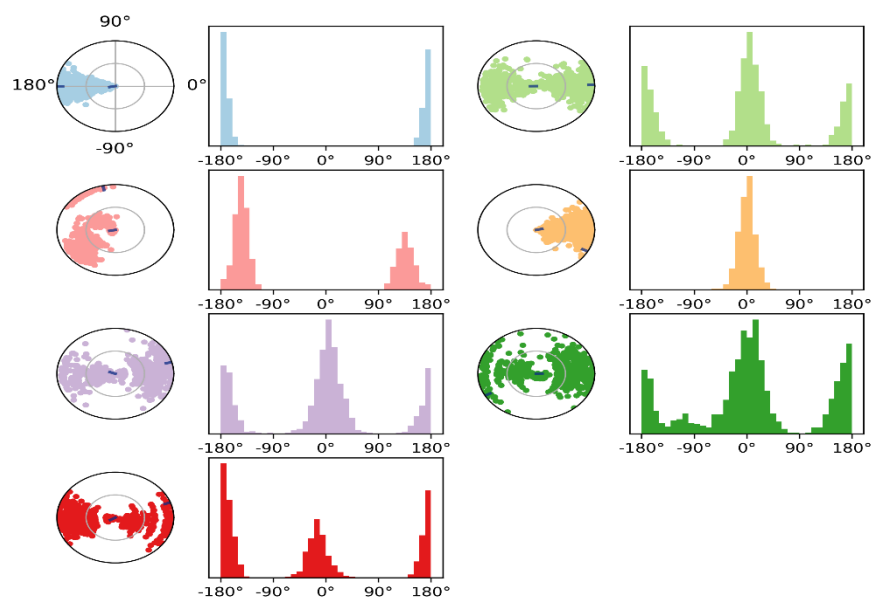

**Figure S14.** Torsional angles of the myricetin.



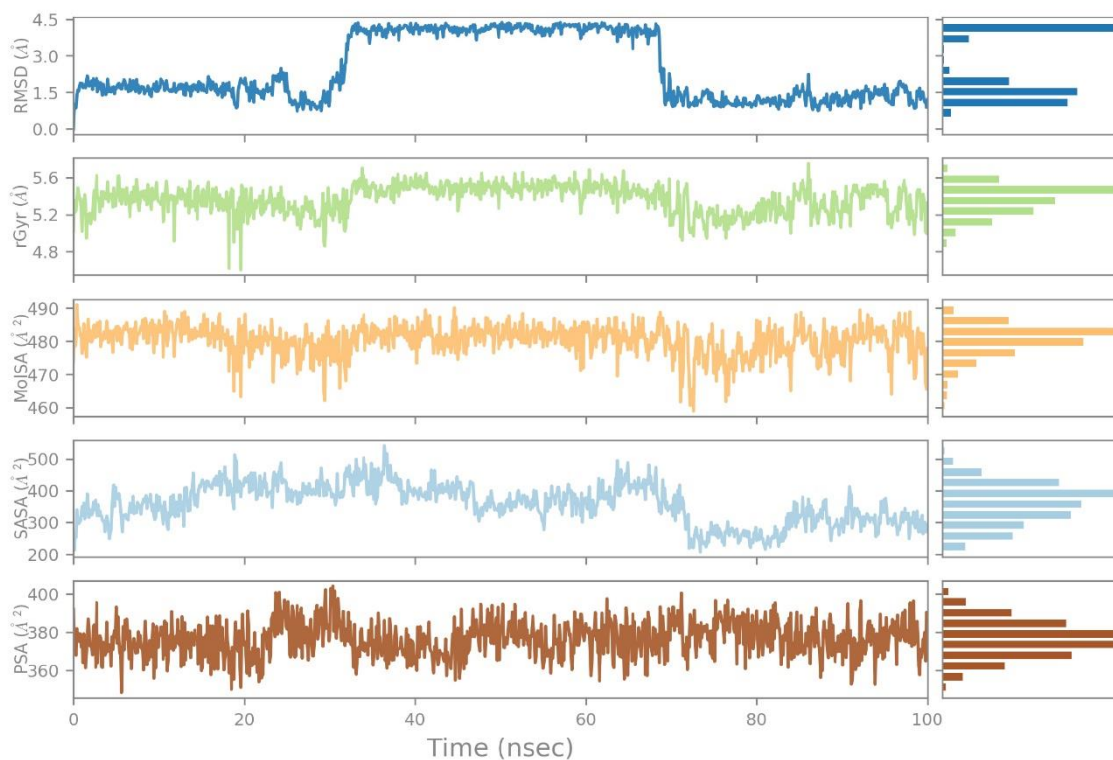

**Figure S15.** Polar surface area, solvent accessible surface area, the van der Waals surface area, radius of gyration and RMSD of the RdRp in complex with the naringoside during 100 ns simulation.

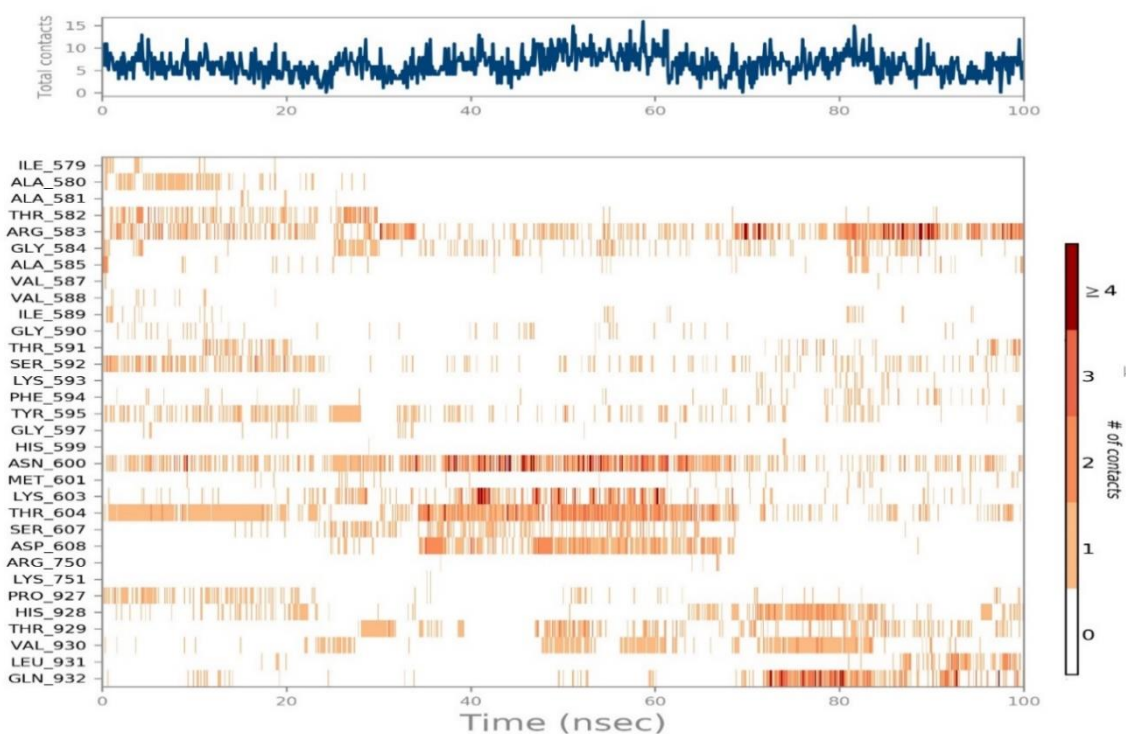

**Figure S16.** Number of contacts made by the allosteric and other residues of RdRp.

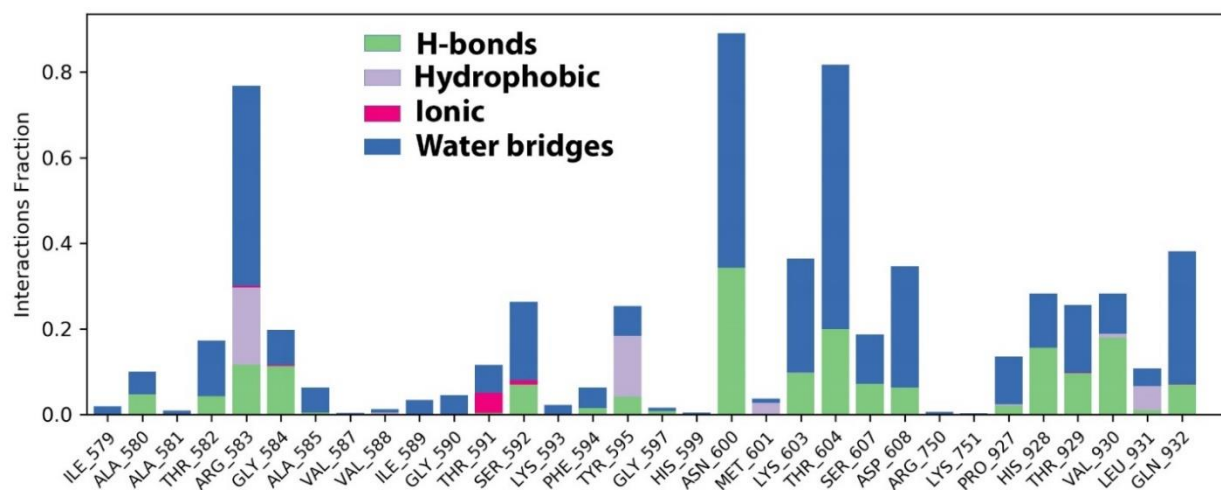

**Figure S17.** Various types of interactions and its total fraction made by the allosteric residues with ligand.

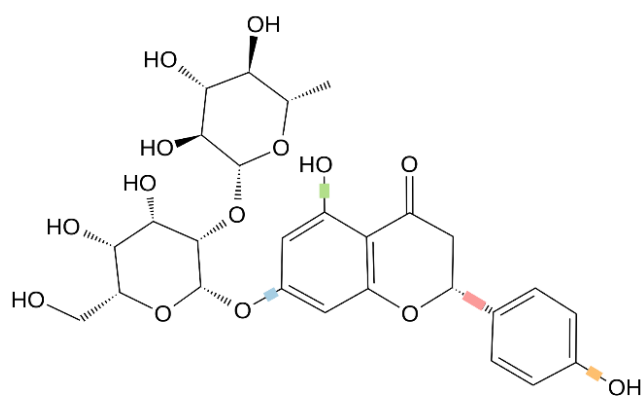

**Figure S18.** Torsion angles of the naringoside ligand.

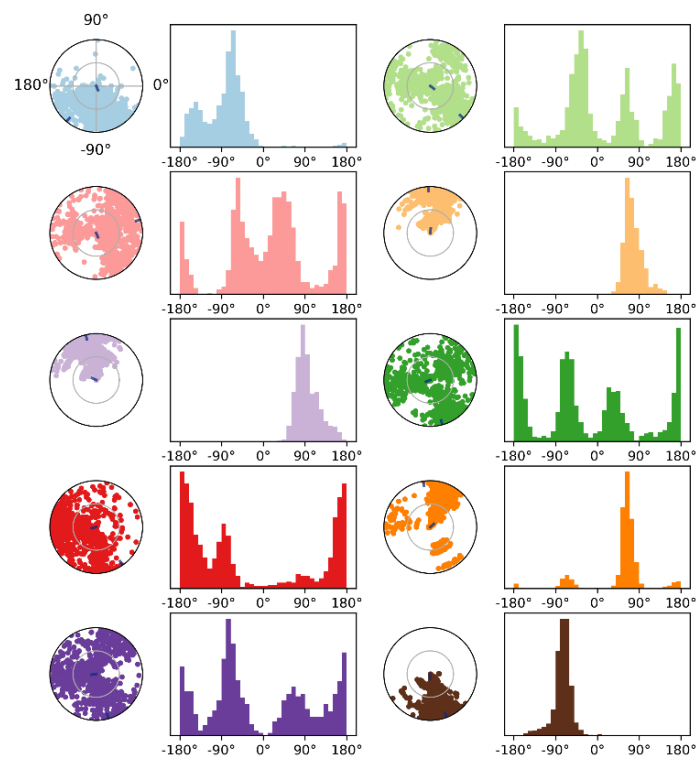

**Figure S19.** Torsional angles of the narigoside.
